# Supplementary material for: Potential Risk Assessment of Different Sizes of Microplastics on the Digestive System of Hybrid Sturgeon
Source: Research Square preprint supplement (doi:10.21203/rs.3.rs-7701975/v1), 2025-10-16
Supplement: Supplementary file 1 [file 59f9784569b77bee8b85421b.pdf]

## Supplementary Material

### Supplementary Figures S3

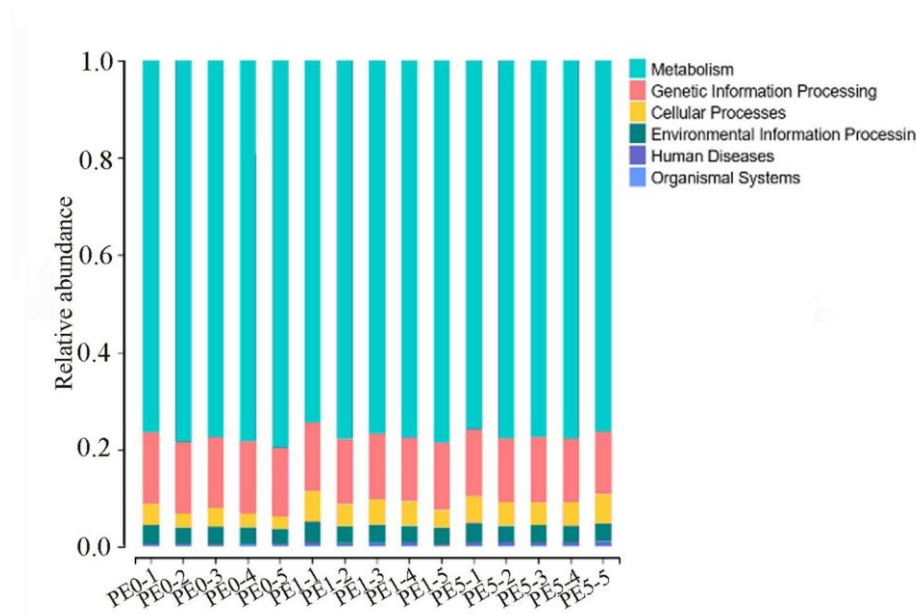

**Supplementary Fig. S3** Abundance of KEGG pathway at level 1 in intestinal flora of hybrid sturgeon across different groups after microplastic ingestion

**Title:** Potential Risk Assessment of Different Sizes of Microplastics on the Digestive System of Hybrid Sturgeon

**Journal:** Environmental Geochemistry and health

**Corresponding author:** Shiyong Yang

College of Animal Science and Technology, Sichuan Agricultural University, Chengdu, 611130, China

**e-mail:** wujy@sicau.edu.cn
