# Supplementary material for: Potential Risk Assessment of Different Sizes of Microplastics on the Digestive System of Hybrid Sturgeon
Source: Research Square preprint supplement (doi:10.21203/rs.3.rs-7701975/v1), 2025-10-16
Supplement: Supplementary file 2 [file a753a319c063beb71c8dfb6d.pdf]

## Supplementary Material

### Supplementary Figures S1

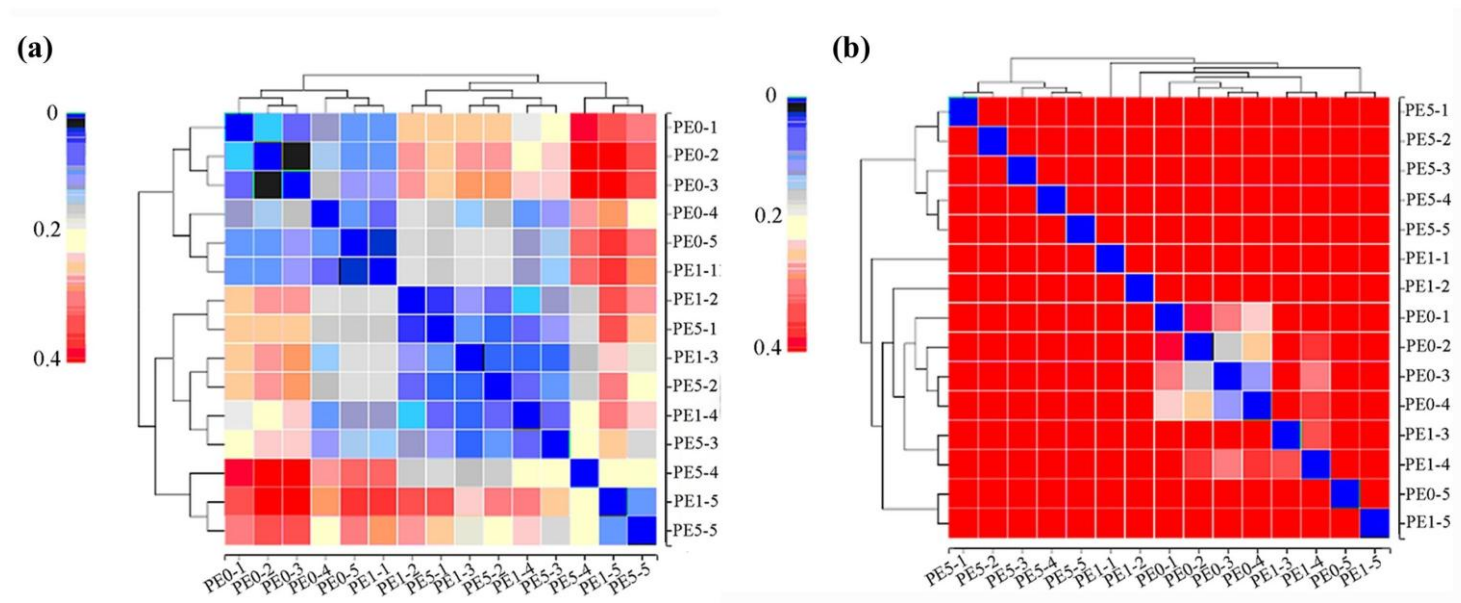

**Supplementary Fig. S1** Heatmap of microbial community composition in hybrid sturgeon after treatment with different microplastics. **a-b** Beta diversity heatmap (Figure f is based on Weighted unifrac, and figure g is based on Unweighted Unifrac)

**Title:** Potential Risk Assessment of Different Sizes of Microplastics on the Digestive System of Hybrid Sturgeon

**Journal:** Environmental Geochemistry and health

**Corresponding author:** Shiyong Yang

College of Animal Science and Technology, Sichuan Agricultural University, Chengdu, 611130, China

**e-mail:** wujy@sicau.edu.cn
