# Supplementary material for: Potential Risk Assessment of Different Sizes of Microplastics on the Digestive System of Hybrid Sturgeon
Source: Research Square preprint supplement (doi:10.21203/rs.3.rs-7701975/v1), 2025-10-16
Supplement: Supplementary file 3 [file b899b528af53535d2e5aee8b.pdf]

## Supplementary Material

### Supplementary Figures S2

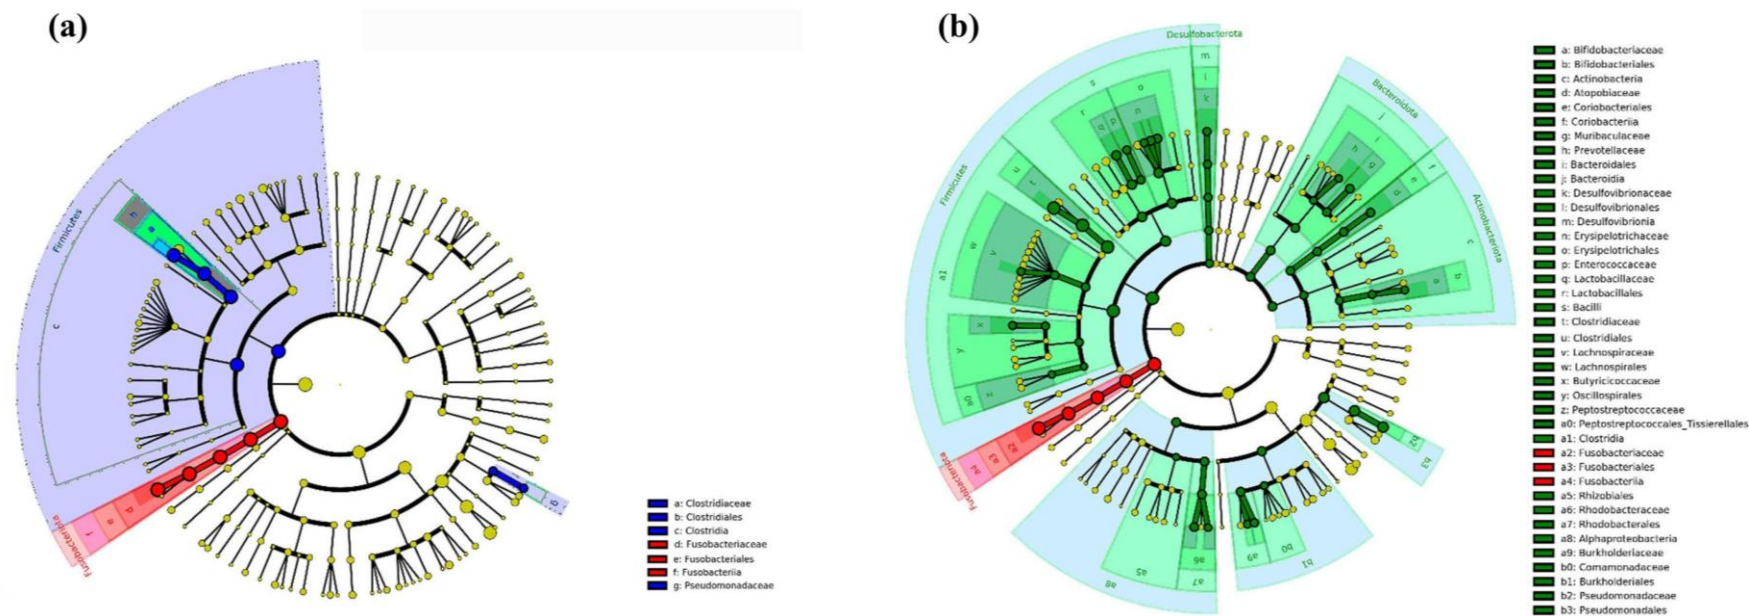

**Supplementary Fig. S2** LefSe analysis of intestinal flora in hybrid sturgeon after microplastic ingestion. **a-b** LefSe cluster diagram of different hybrid sturgeon groups after microplastics ingestion

**Title:** Potential Risk Assessment of Different Sizes of Microplastics on the Digestive System of Hybrid Sturgeon

**Journal:** Environmental Geochemistry and health

**Corresponding author:** Shiyong Yang

College of Animal Science and Technology, Sichuan Agricultural University, Chengdu, 611130, China

**e-mail:** wujy@sicau.edu.cn
